# Supplementary material for: Determining Optimal Routes to Surgery for Borderline Resectable Venous Pancreatic Cancer—Where Is the Least Harm and Most Benefit?
Source: PubMed Central journal article supplement (PMC6811510; doi:10.3389/fonc.2019.01060), 2019-10-17
Supplement: Image_1.pdf [file Image_1.pdf]

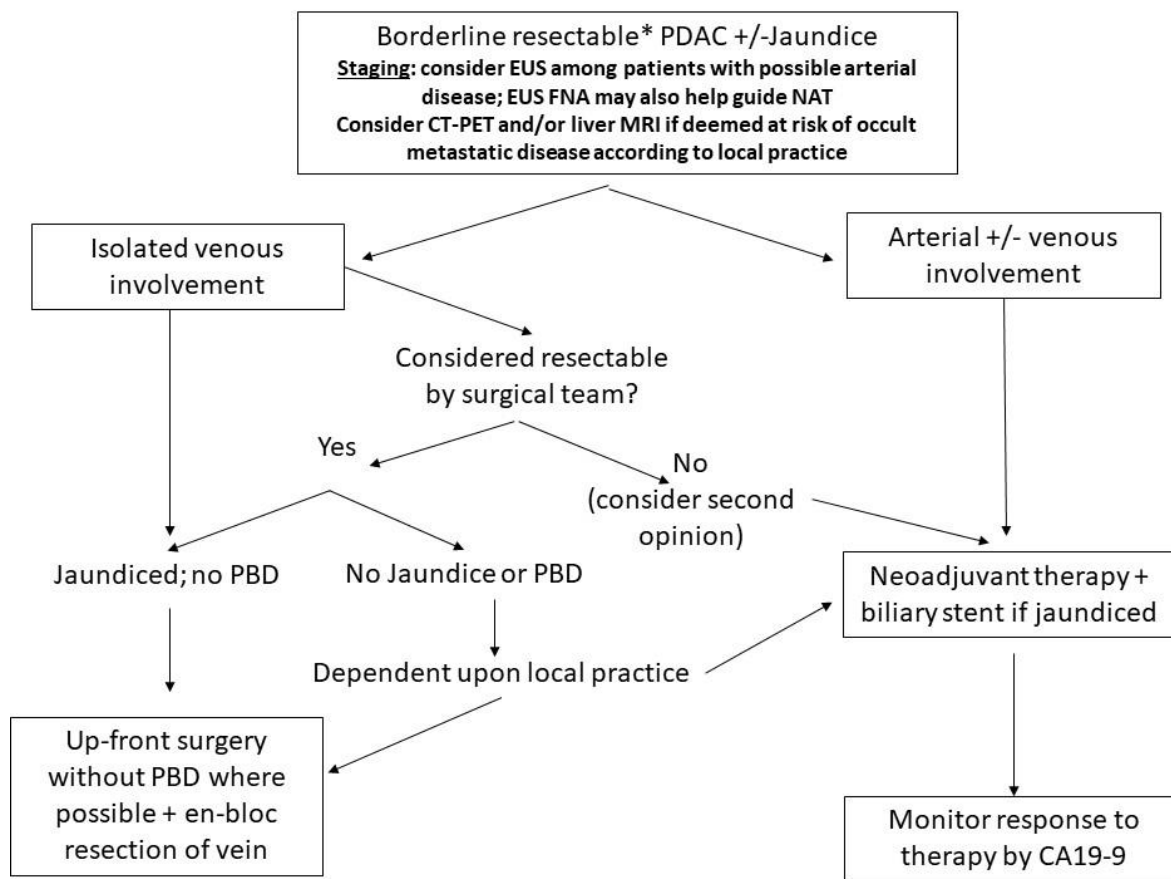

Figure 1: Algorithm for borderline resectable PDAC. \*Borderline resectable PDAC defined as:

NCCN/ISGPS

- Borderline: venous involvement of the SMV/PV with distortion or narrowing of the vein or occlusion of the vein with suitable vessel proximal and distal allowing for safe resection and replacement tumour contact >180 degrees or contact <180 degrees, with contour irregularity or thrombosis and suitable for recon; SMA: solid contact <180 degrees or short segment contact
- Locally advanced: Unreconstructable SMV and/or PV due to tumour involvement or occlusion OR Contact with most proximal draining jejunal branch into SMV.

AHPBA/SSAT/SSO/NCCN

- SMV/PV abutment/impingement/encasement/short segment occlusion.
- SMA abutment HA abutment or short segment encasement CA uninvolved

MD Anderson

- SMV occlusion SMA abutment HA abutment or short segment encasement CA abutment

Alliance Vein

- Tumour-vessel interface  $\geq 180^\circ$  of vessel wall circumference, and/or reconstructable occlusion SMA: Tumour-vessel interface <  $180^\circ$  of vessel wall circumference
